# Supplementary material for: A Study on the Solidification Behaviour of Al-Cr-La Alloys in the Aluminium-Rich Region
Source: Research Square preprint supplement (doi:10.21203/rs.3.rs-7796354/v1), 2025-11-05
Supplement: Supplementary file 1 [file 9c40588ece6cc799169c261b.docx]

1. **DSC results**


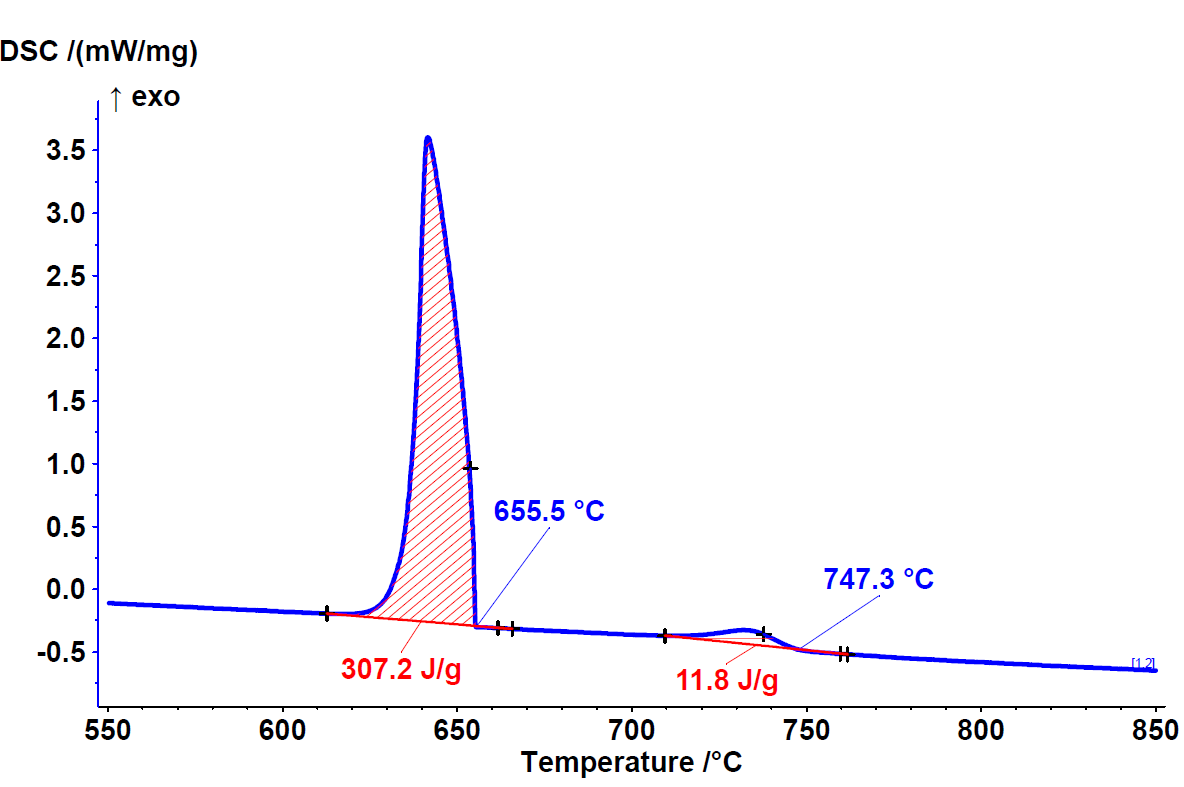


**Fig. 1** Sample A


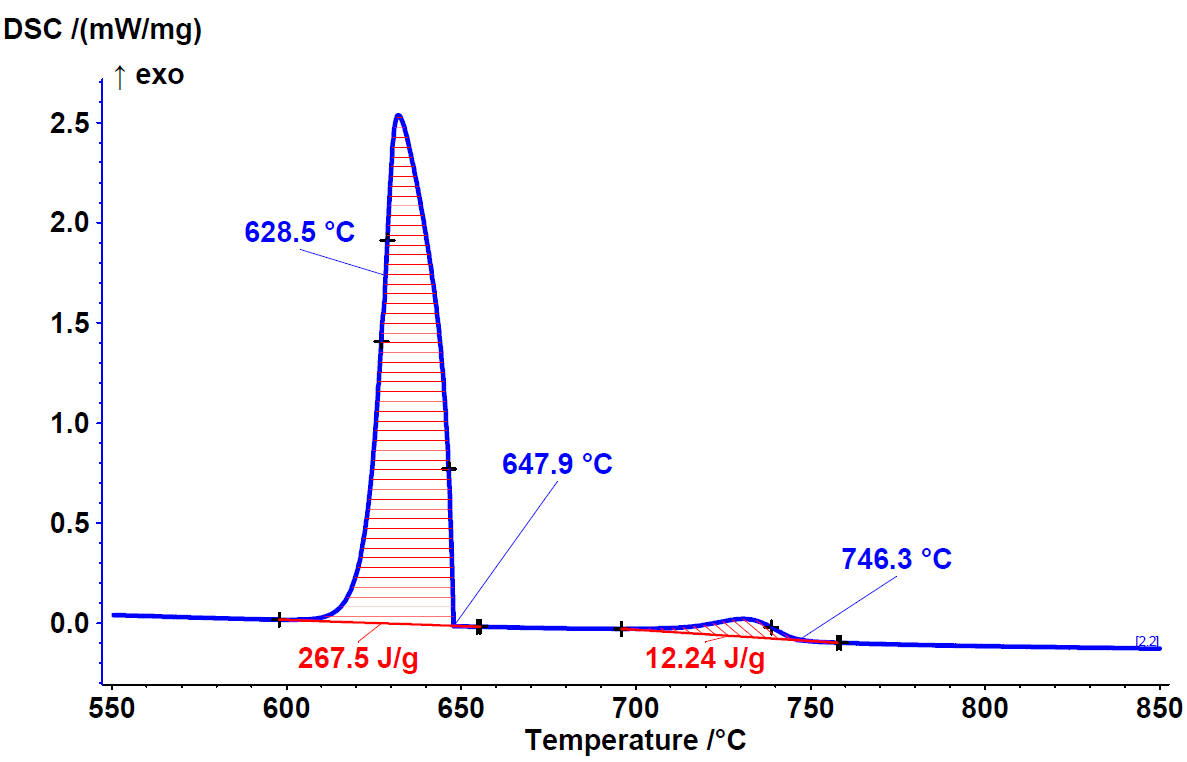


**Fig. 2** Sample B


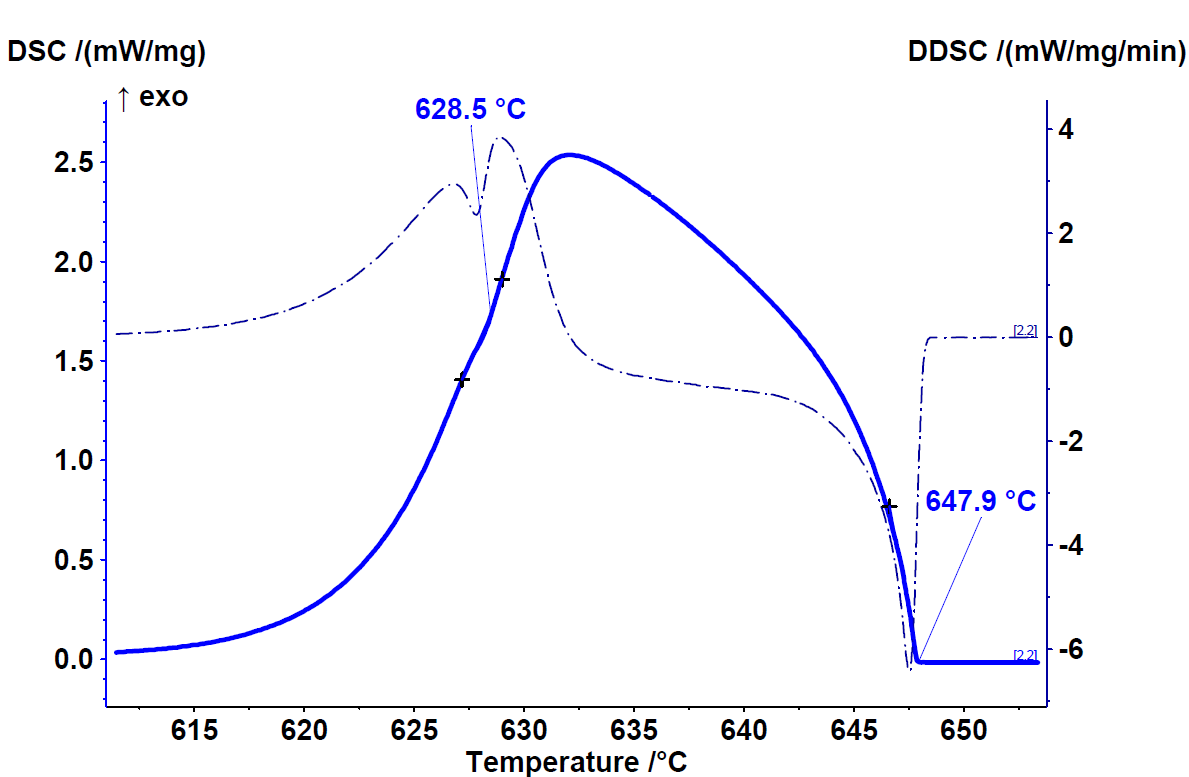


**Fig. 3** Sample B (magnification of the low temperature peak)


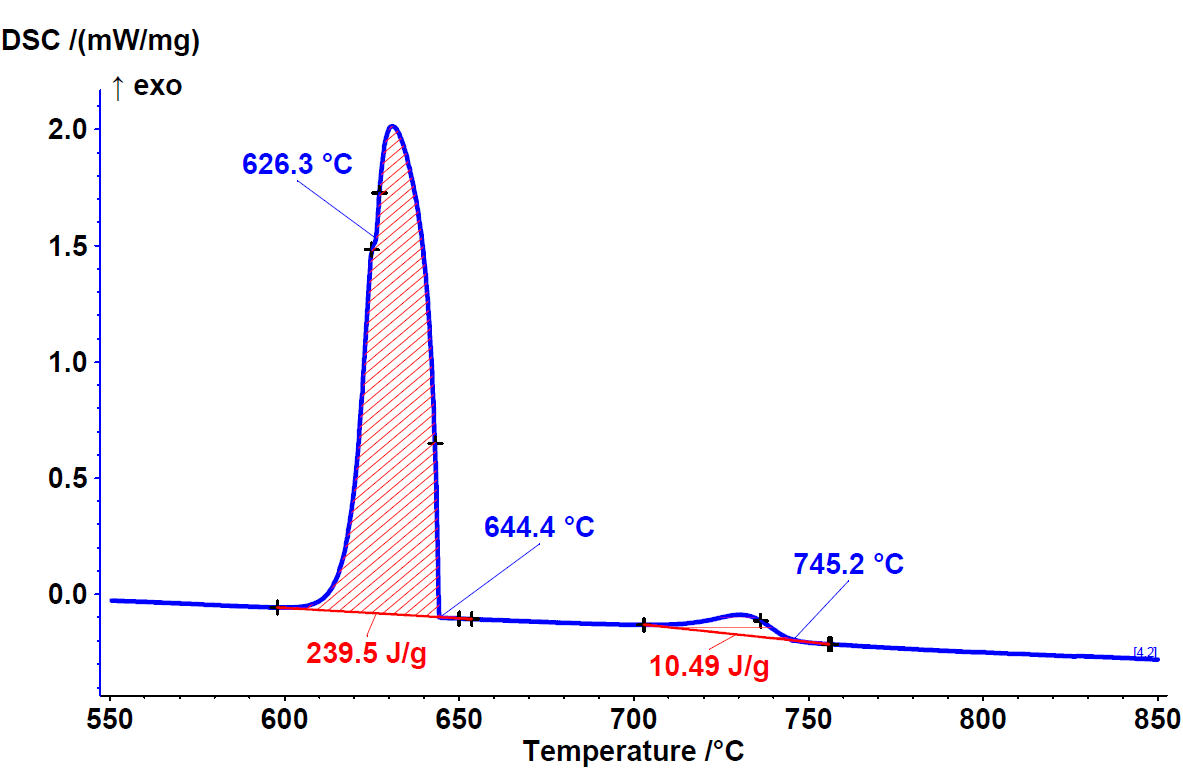


**Fig. 4** Sample D


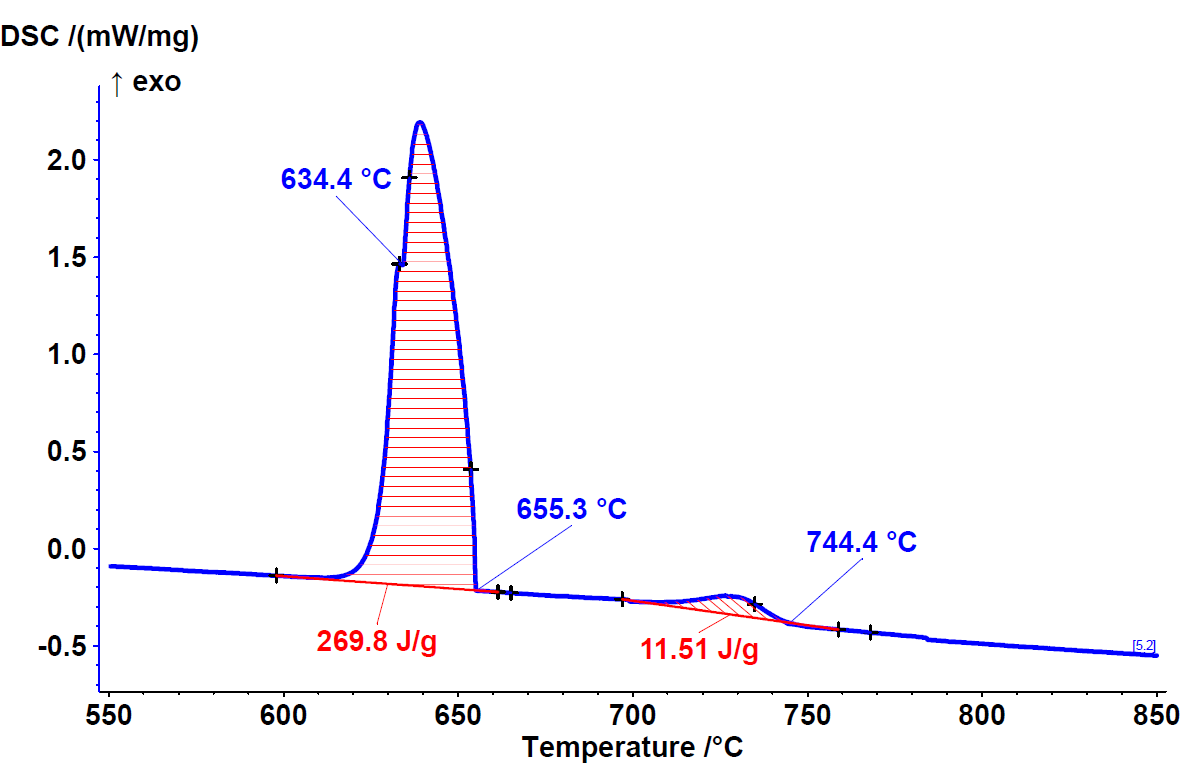


**Fig. 5** Sample E


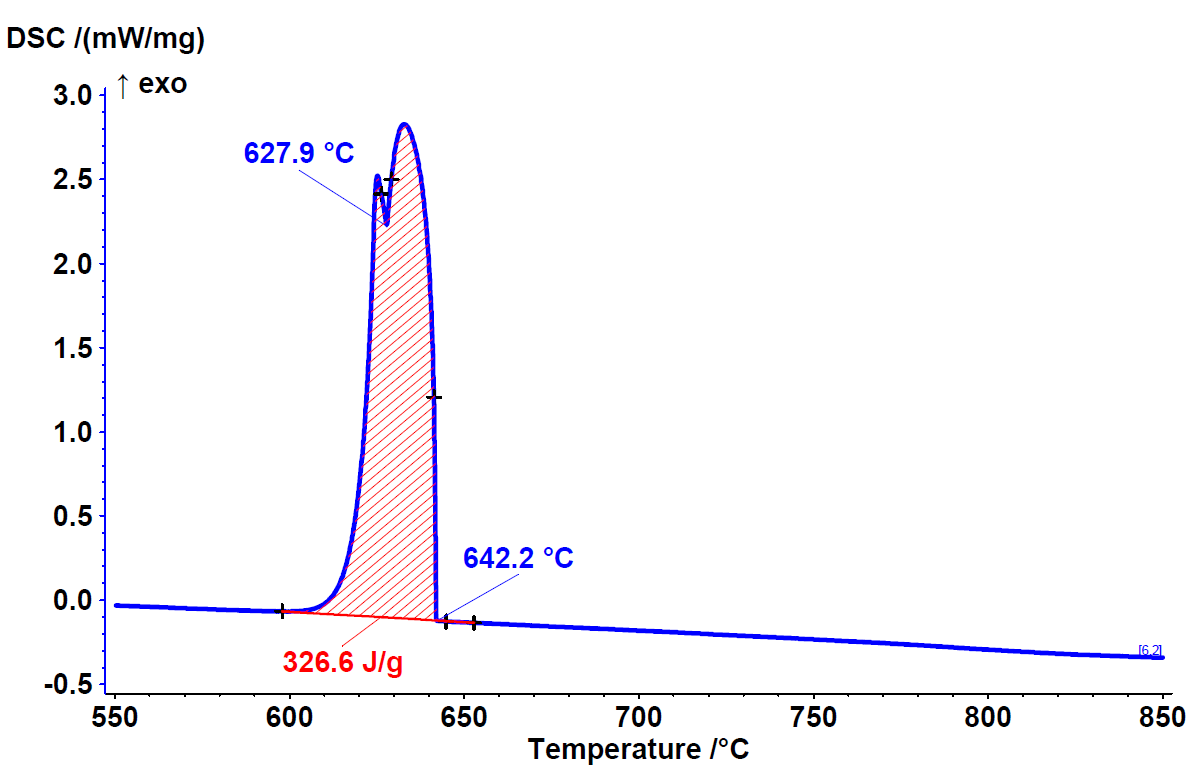


**Fig. 6** Sample F


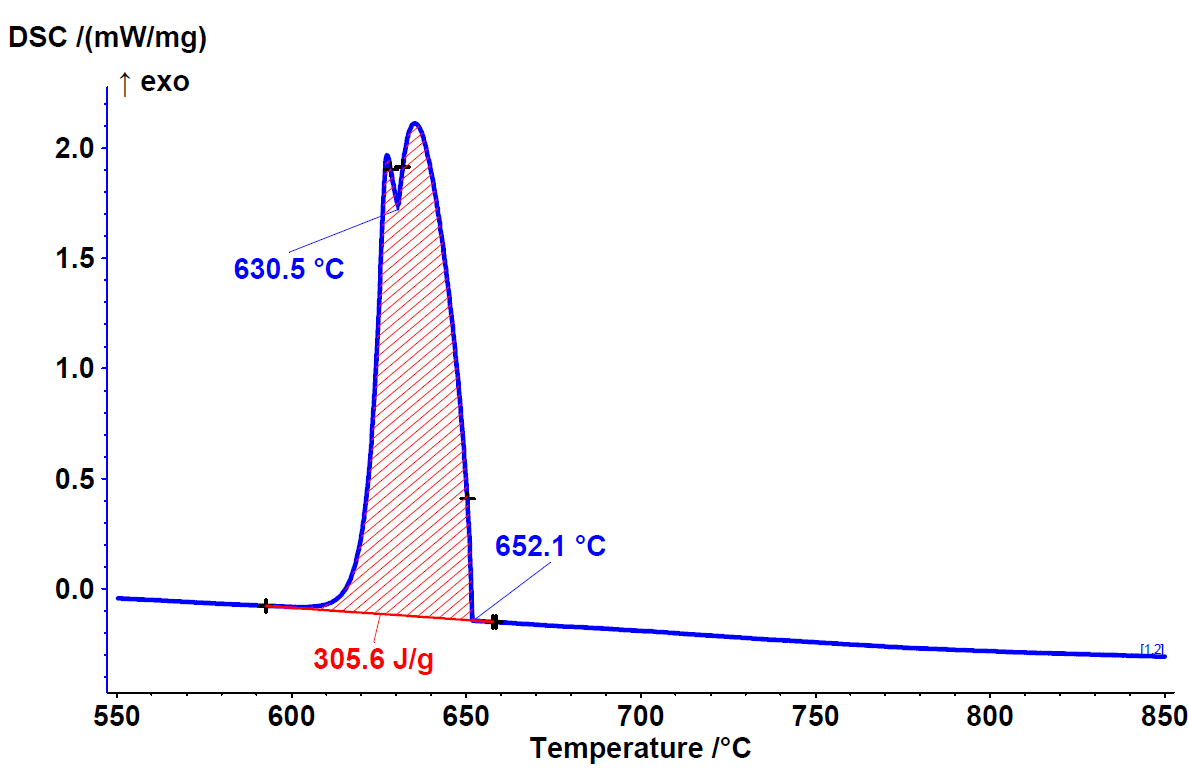


**Fig. 7** Sample G


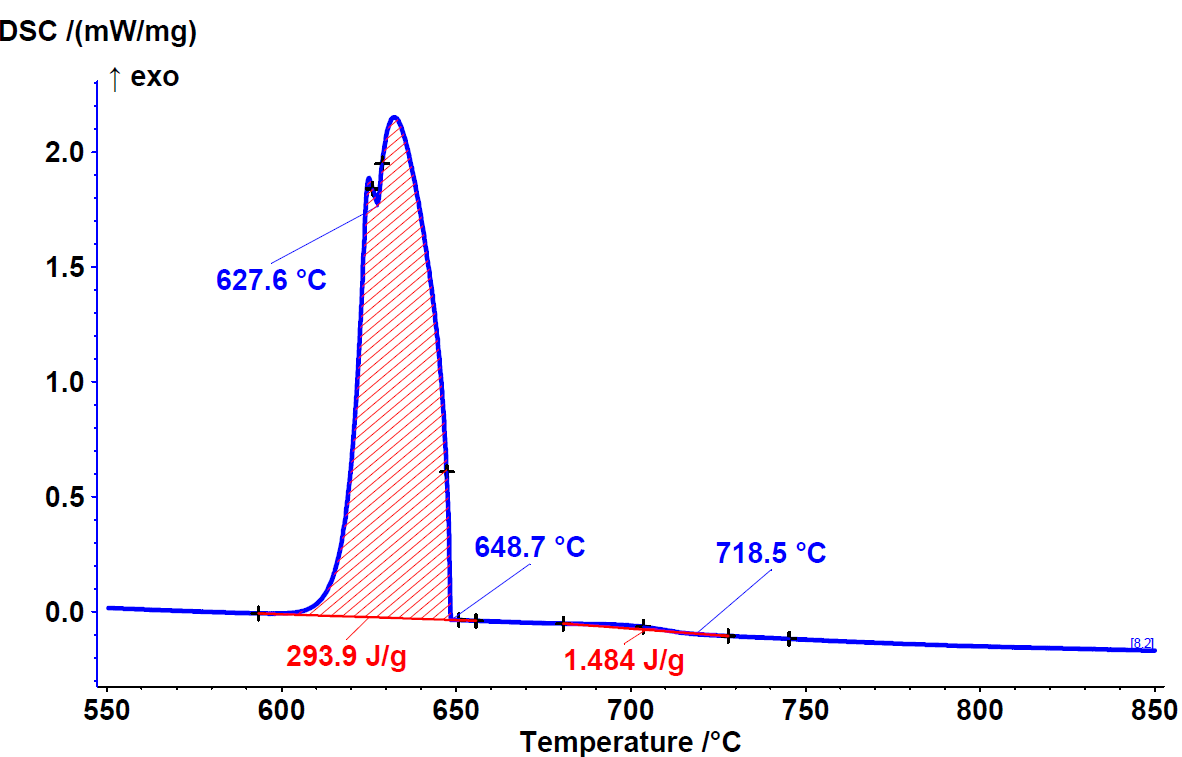


**Fig. 8** Sample H


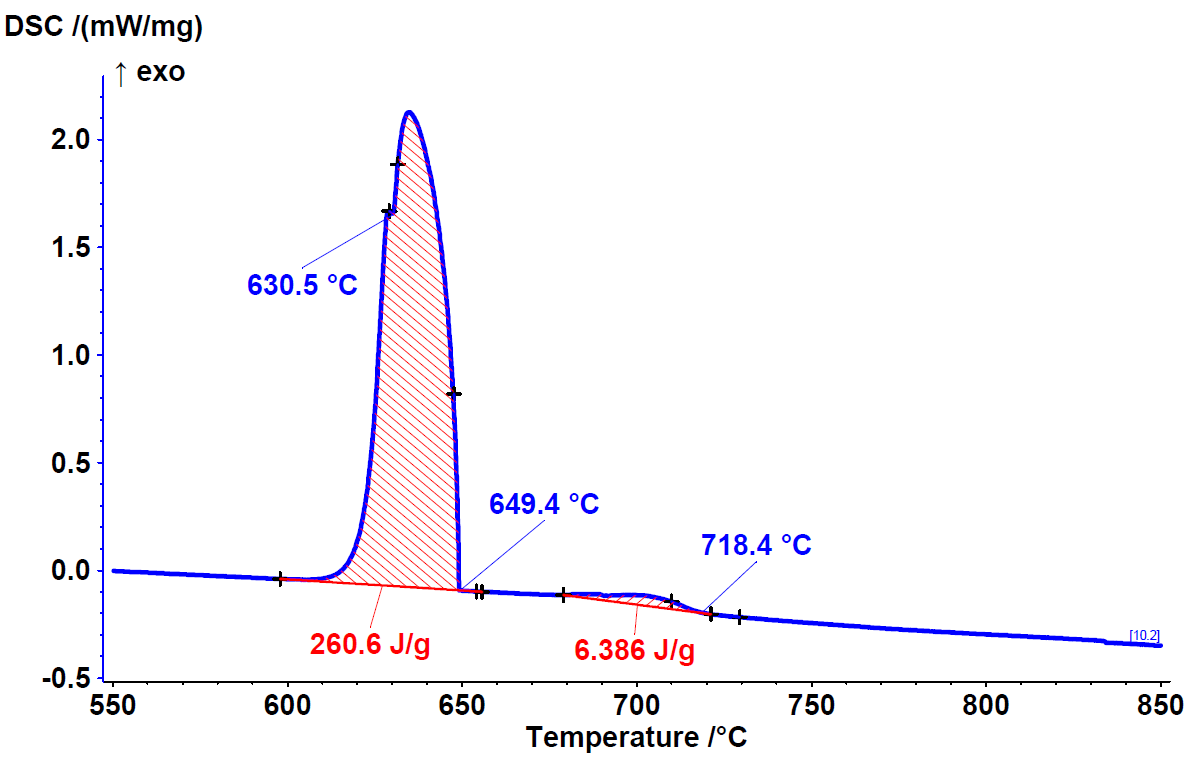


**Fig. 9** Sample J

1. **SEM results**


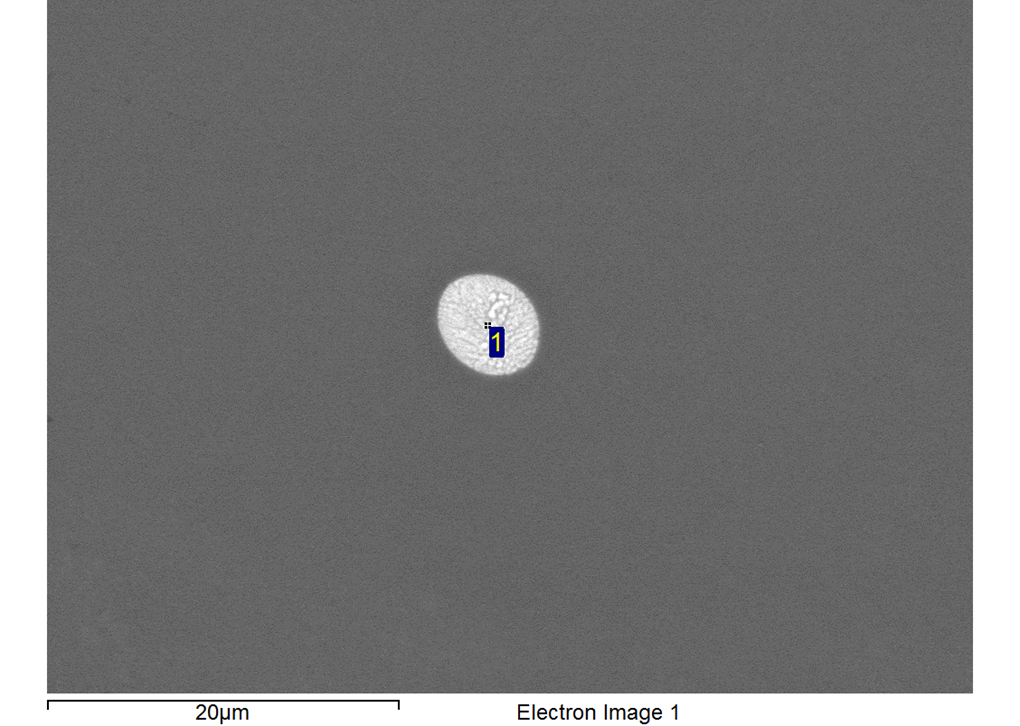


**Fig. 10** Drop of mixture (Al) + Al11La3 in the microstructure of sample A

Table 1. EDS analysis of the Spectrum 1 in figure 10

|  | at.% | | |
| --- | --- | --- | --- |
| Spectrum | Al | Cr | La |
| 1 | 90.8 | 1.7 | 7.5 |

**
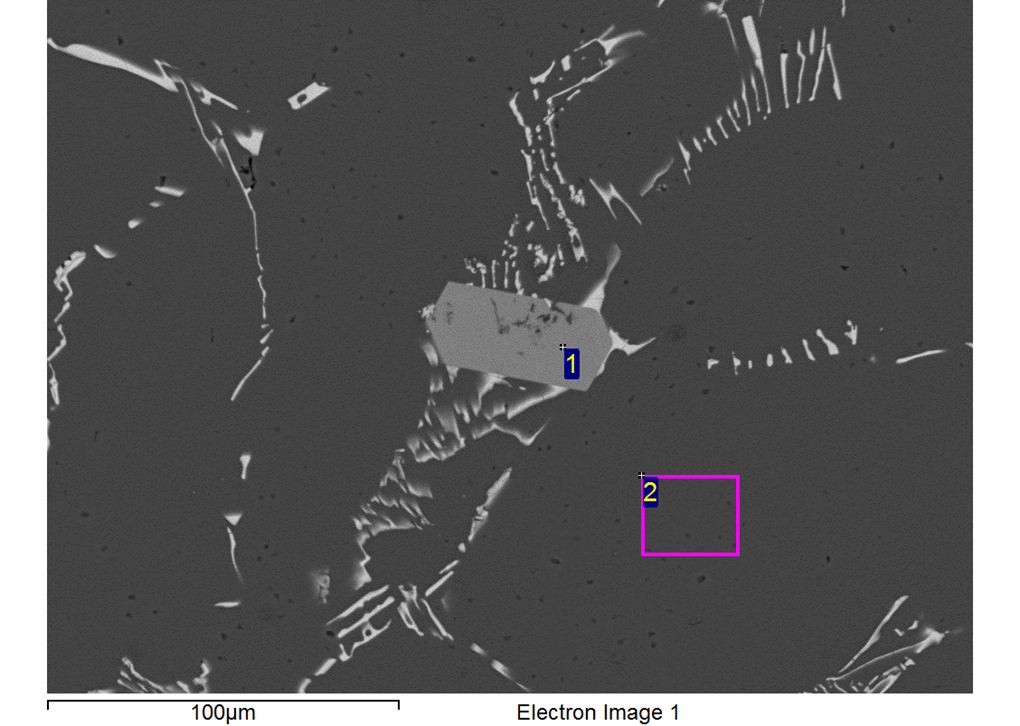
**

**Fig. 11** Microstructure of sample G (just to prove that ternary LaCr2Al20 phase (Spectrum 1) is present in the microstructure)

Table 2. EDS analysis of the Spectrum 1 and 2 in figure 11

|  | at.% | | |
| --- | --- | --- | --- |
| Spectrum | Al | Cr | La |
| 1 | 87.4 | 8.0 | 4.6 |
| 2 | 99.8 | 0.2 | / |

Microstructure of samples H to J (to prove that the proportion of the ternary phase LaCr2Al20 increases from H to J). Sharp-edged dark grey phases are ternary LaCr2Al20 phases.


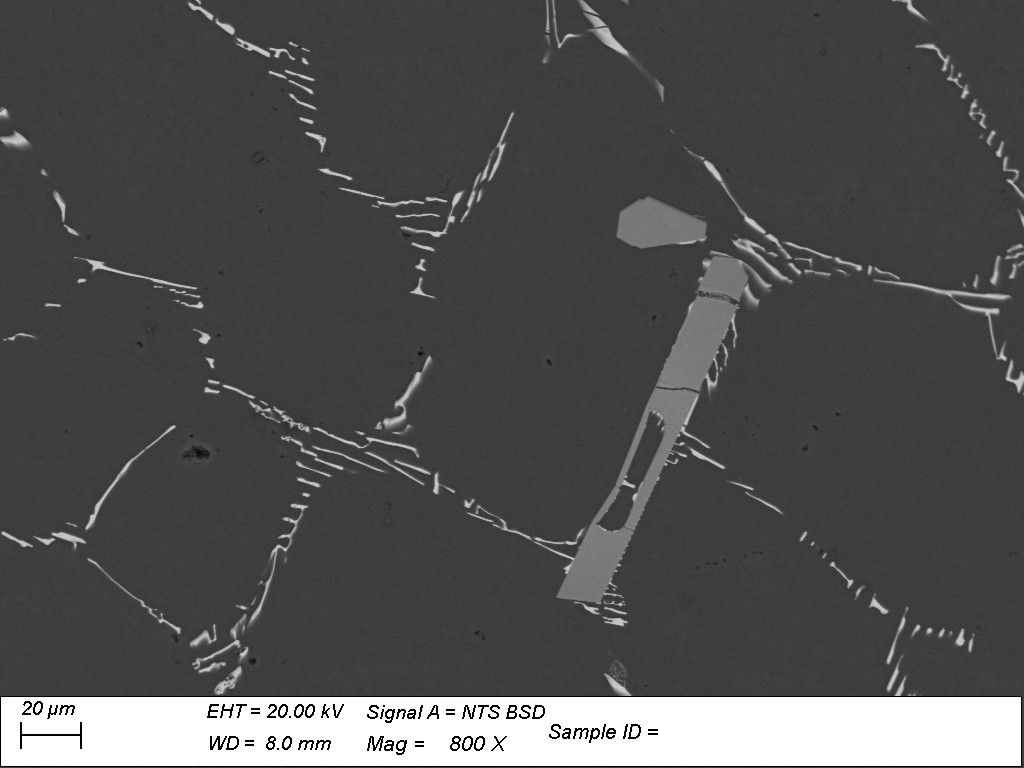


**Fig. 12** Microstructure of sample H


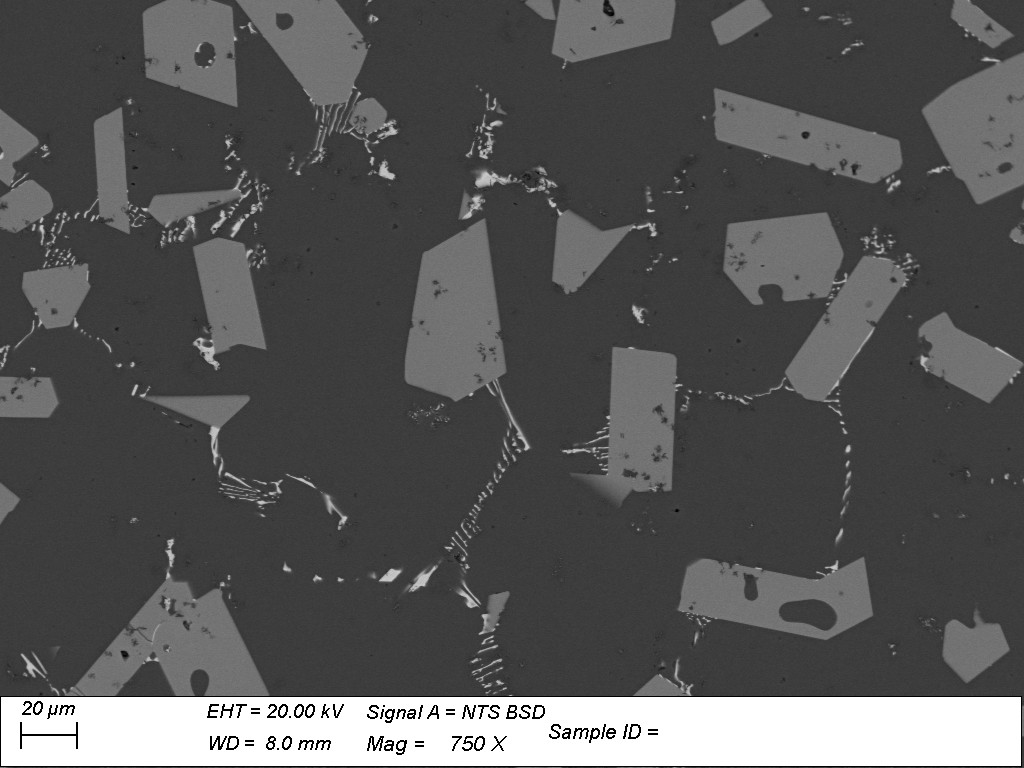


**Fig. 13** Microstructure of sample I





**Fig. 14** Microstructure of sample J
